# Supplementary material for: Mollusc-Derived Brominated Indoles for the Selective Inhibition of Cyclooxygenase: A Computational Expedition
Source: MDPI journal article supplement (doi:10.3390/molecules26216538), 2021-10-29
Supplement: s1 [file s1]

*Supplementary Material*

# Mollusc Derived Brominated Indoles for the Selective Inhibition of Cyclooxygenase: A Computational Expedition

Md. Mominur Rahman <sup>1</sup>, Md. Junaid <sup>2</sup>, S. M. Zahid Hosen <sup>2,3</sup>, Mohammad Mostafa <sup>2</sup>, Lei Liu <sup>4</sup> and Kirsten Benkendorff <sup>1,5,\*</sup>

<sup>1</sup> Marine Ecology Research Centre, Faculty of Science and Engineering, Southern Cross University, Lismore, NSW 2480, Australia; m.rahman.23@student.scu.edu.au

<sup>2</sup> Molecular Modeling Drug-design and Discovery Laboratory, Pharmacology Research Division, BCSIR Laboratories Chattogram, Bangladesh Council of Scientific and Industrial Research, Chattogram, Bangladesh; md.junaid@northsouth.edu (M.J.); drmostafabcsir@yahoo.com (M.M.)

<sup>3</sup> Pancreatic Research Group, South Western Sydney Clinical School, and Ingham Institute for Applied Medical Research, Faculty of Medicine, University of New South Wales, Australia; s.hosen@student.unsw.edu.au

<sup>4</sup> Southern Cross Plant Science, Southern Cross University, Lismore, NSW 2480, Australia; ben.liu@scu.edu.au

<sup>5</sup> National Marine Science Centre, Southern Cross University, Coffs Harbour, New South Wales, Australia; kirsten.benkendorff@scu.edu.au

\* Correspondence: kirsten.benkendorff@scu.edu.au

**Table S1.** Summary of nonbonding interactions analysis for Cyclooxygenase-1 (PDB ID: 3N8X), for the reference molecule aspirin and four *D. orbita* compounds.

| Compounds<br>Name                     | Hydrogen Bond             |                            |                                   |          | Bonding<br>type      | Hydrophobic Bond                |                                   |          | Bonding<br>type           | Electrostatic Bond (EB) / Halogen Bond (HB) / Other Bond (OB) |                                   |          |
|---------------------------------------|---------------------------|----------------------------|-----------------------------------|----------|----------------------|---------------------------------|-----------------------------------|----------|---------------------------|---------------------------------------------------------------|-----------------------------------|----------|
|                                       | Bonding<br>type           | Protein                    | Ligand                            | Distance |                      | Protein                         | Ligand                            | Distance |                           | Protein                                                       | Ligand                            | Distance |
|                                       |                           | Interacting<br>amino acids | Interact-<br>ing atoms<br>or ring |          |                      | Interacting<br>amino ac-<br>ids | Interact-<br>ing atoms<br>or ring |          |                           | Interacting<br>amino acids                                    | Interact-<br>ing atoms<br>or ring |          |
| Aspirin                               | Conven-<br>tional         | Arg-120                    | H...O                             | 2.04     | Pi-Alkyl             | Leu-352                         | X                                 | 5.07     |                           |                                                               |                                   |          |
|                                       |                           | Arg-120                    | H...O                             | 2.44     |                      | Ile-523                         | X                                 | 4.70     |                           |                                                               |                                   |          |
|                                       | Carbon<br>Hydro-<br>gen   | Ser-530                    | H...O                             | 2.97     |                      | Ala-527                         | X                                 | 4.49     |                           |                                                               |                                   |          |
| Tyrindoxyl Sul-<br>fate               | Conven-<br>tional         | Arg-120                    | H...O                             | 2.41     | Amide<br>Pistacked   | Gly-526                         | X1                                | 4.47     | Attrac-<br>tive<br>Charge | Arg-120                                                       | H...O (EB)                        | 2.13     |
|                                       | Carbon<br>Hydro-<br>gen   | Arg-120                    | H...O                             | 2.13     |                      | Ala-527                         | X1                                | 4.47     |                           |                                                               |                                   |          |
|                                       | Salt<br>Bridge            | Ser-353                    | H...O                             | 2.76     | Alkyl                | Ile-523                         | X3                                | 3.83     | Pi-Sulfur                 | His-90                                                        | X3 (OB)                           | 5.87     |
|                                       |                           |                            |                                   |          | Pi-Alkyl             | Leu-352                         | X2                                | 5.04     |                           |                                                               |                                   |          |
|                                       |                           |                            |                                   |          |                      | Ile-523                         | X2                                | 4.56     |                           |                                                               |                                   |          |
|                                       |                           |                            |                                   |          |                      | Ala-527                         | X2                                | 4.27     |                           |                                                               |                                   |          |
| Tyrindoleninone                       | Carbon<br>Hydro-<br>gen   | Ile-523                    | H...O                             | 2.73     | Amide<br>Pistacked   | Gly-526                         | X1                                | 4.87     | Pi-Sulfur                 | Met-522                                                       | X1 (OB)                           | 5.98     |
|                                       |                           |                            |                                   |          |                      | Ala-527                         | X4                                | 4.87     |                           |                                                               |                                   |          |
|                                       |                           |                            |                                   |          |                      | Gly-526                         | X4                                | 3.96     |                           |                                                               |                                   |          |
|                                       |                           |                            |                                   |          |                      | Ala-527                         | X1                                | 3.96     |                           |                                                               |                                   |          |
|                                       |                           |                            |                                   |          | Alkyl                | Ile-523                         | X3                                | 4.77     |                           |                                                               |                                   |          |
|                                       |                           |                            |                                   |          |                      | Tyr-355                         | X3                                | 4.19     |                           |                                                               |                                   |          |
|                                       |                           |                            |                                   |          |                      | Val-349                         | X4                                | 5.21     |                           |                                                               |                                   |          |
|                                       |                           |                            |                                   |          |                      | Leu-352                         | X4                                | 4.82     |                           |                                                               |                                   |          |
|                                       |                           |                            |                                   |          | Pi-Alkyl             | Ala-527                         | X4                                | 3.93     |                           |                                                               |                                   |          |
|                                       |                           |                            |                                   |          |                      | Leu-352                         | X1                                | 5.18     |                           |                                                               |                                   |          |
|                                       |                           |                            |                                   |          |                      | Ala-527                         | X1                                | 4.71     |                           |                                                               |                                   |          |
| 6-Bromoisatin                         |                           |                            |                                   |          | Amide Pi-<br>stacked | Gly-526                         | X5                                | 3.88     |                           |                                                               |                                   |          |
|                                       |                           |                            |                                   |          |                      | Ala-527                         | X1                                | 3.88     |                           |                                                               |                                   |          |
|                                       |                           |                            |                                   |          |                      | Gly-526                         | X1                                | 4.97     |                           |                                                               |                                   |          |
|                                       |                           |                            |                                   |          |                      | Ala-527                         | X5                                | 4.97     |                           |                                                               |                                   |          |
|                                       |                           |                            |                                   |          | Pi-Alkyl             | Leu-352                         | X5                                | 5.17     |                           |                                                               |                                   |          |
|                                       |                           |                            |                                   |          |                      | Ala-527                         | X5                                | 4.38     |                           |                                                               |                                   |          |
|                                       |                           |                            |                                   |          |                      | Val-349                         | X1                                | 5.05     |                           |                                                               |                                   |          |
|                                       |                           |                            |                                   |          |                      | Leu-352                         | X1                                | 5.04     |                           |                                                               |                                   |          |
|                                       |                           |                            |                                   |          |                      | Ala-527                         | X1                                | 3.71     |                           |                                                               |                                   |          |
|                                       |                           |                            |                                   |          |                      | Gly-526                         | X6                                | 4.83     | Attrac-<br>tive<br>charge | Arg-120                                                       | N-H...O<br>(EB)                   | 5.41     |
| 6,6' dibromoindi-<br>rubin            | Carbon<br>Hydro-<br>gen   | Ser-353                    | H...O                             | 2.59     | Amide Pi-<br>stacked | Ala-527                         | X1                                | 4.83     |                           |                                                               |                                   |          |
|                                       |                           |                            |                                   |          |                      | Gly-526                         | X1                                | 3.96     |                           |                                                               |                                   |          |
|                                       |                           |                            |                                   |          |                      | Ala-527                         | X6                                | 3.96     |                           |                                                               |                                   |          |
|                                       |                           |                            |                                   |          |                      | Ala-527                         | X6                                | 3.96     |                           |                                                               |                                   |          |
|                                       | Pi-donor<br>Hydro-<br>gen | Tyr-355                    | H...O                             | 2.59     | Alkyl                | Leu-384                         | Br                                | 4.86     | Pi-An-<br>ion             | Tyr-355                                                       | O (EB)                            | 4.20     |
|                                       |                           |                            |                                   |          |                      | Phe-381                         | Br                                |          |                           |                                                               |                                   |          |
|                                       |                           |                            |                                   |          |                      | Tyr-385                         | Br                                |          |                           |                                                               |                                   |          |
|                                       |                           |                            |                                   |          |                      | Trp-387                         | Br                                |          |                           |                                                               |                                   |          |
| 6,6' dibromoindi-<br>rubin (Continue) |                           |                            |                                   |          | Pi-Alkyl             | Val-349                         | X6                                |          |                           |                                                               |                                   |          |
|                                       |                           |                            |                                   |          |                      | Ala-527                         | X6                                |          |                           |                                                               |                                   |          |
|                                       |                           |                            |                                   |          |                      | Val-349                         | X6                                |          |                           |                                                               |                                   |          |
|                                       |                           |                            |                                   |          |                      | Leu-352                         | X6                                |          |                           |                                                               |                                   |          |
|                                       |                           |                            |                                   |          |                      | Ile-523                         | X6                                |          |                           |                                                               |                                   |          |
|                                       |                           |                            |                                   |          |                      | Ala-527                         | X6                                |          |                           |                                                               |                                   |          |
|                                       |                           |                            |                                   |          |                      | Val-349                         | X1                                |          |                           |                                                               |                                   |          |
|                                       |                           |                            |                                   |          |                      | Leu-359                         | X1                                |          |                           |                                                               |                                   |          |
|                                       |                           |                            |                                   |          |                      | Ala-527                         | X1                                |          |                           |                                                               |                                   |          |
|                                       |                           |                            |                                   |          |                      | Leu-531                         | X1                                |          |                           |                                                               |                                   |          |
|                                       |                           |                            |                                   |          |                      | Leu-352                         | X1                                |          |                           |                                                               |                                   |          |

Here, X, X1, X2, X3 indicates that, X = Benzene, X1 = 6-Bromo benzene, X2 = Indole-3-ol, X3 = (Methylthio)methane, X4 = Indole-3-one, X5 = Indoline-2,3-dione, X6 = Indolin-2-one.

**Table S2.** Summary of nonbonding interactions analysis for Cyclooxygenase-2 (PDB ID: 5IKR), for the reference molecule aspirin and four *D. orbita* compounds.

| Compounds<br>Name         | Hydrogen Bond            |                                    |                                    |                                    | Hydrophobic Bond     |                                  |                                    |                                    | Electrostatic Bond (EB) / Halogen Bond (HB) / Other Bond (OB) |         |           |          |      |  |  |  |  |  |  |  |
|---------------------------|--------------------------|------------------------------------|------------------------------------|------------------------------------|----------------------|----------------------------------|------------------------------------|------------------------------------|---------------------------------------------------------------|---------|-----------|----------|------|--|--|--|--|--|--|--|
|                           | Bonding<br>Type          | Protein                            | Ligand                             | Dis -<br>tance                     | Bonding<br>Type      | Protein                          | Ligand                             | Distance                           | Bonding<br>Type                                               | Protein | Ligand    | Distance |      |  |  |  |  |  |  |  |
|                           |                          | Inter-<br>acting<br>Amino<br>Acids | Interact-<br>ing Atoms<br>or Rings | Interact-<br>ing<br>Amino<br>Acids |                      | Interacting<br>Atoms or<br>Rings | Inter-<br>acting<br>Amino<br>Acids | Interact-<br>ing Atoms<br>or Rings |                                                               |         |           |          |      |  |  |  |  |  |  |  |
| Aspirin                   | Conventional<br>Hydrogen | Tyr-385                            | H...O                              | 1.79                               | Amide<br>Pi-stacked  | Gly-526                          | X                                  | 3.76                               |                                                               |         |           |          |      |  |  |  |  |  |  |  |
|                           |                          | Ser-530                            | H...O                              | 1.83                               |                      | Ala-527                          | X                                  | 3.76                               |                                                               |         |           |          |      |  |  |  |  |  |  |  |
|                           |                          | Pi-Alkyl                           | Leu-352                            | X                                  | 5.13                 |                                  |                                    |                                    |                                                               |         |           |          |      |  |  |  |  |  |  |  |
|                           |                          |                                    | Ala-527                            | X                                  | 4.82                 |                                  |                                    |                                    |                                                               |         |           |          |      |  |  |  |  |  |  |  |
|                           |                          |                                    |                                    |                                    |                      |                                  |                                    |                                    |                                                               |         |           |          |      |  |  |  |  |  |  |  |
| Tyrindoxyl<br>Sulfate     | Conventional<br>Hydrogen | Tyr-385                            | H...O                              | 2.11                               | Pi-Alkyl             | Val-349                          | X2                                 | 5.03                               | Pi-Sulfur                                                     | Trp-387 | X3 (OB)   | 5.72     |      |  |  |  |  |  |  |  |
|                           |                          | Ser-530                            | H...O                              | 2.22                               |                      | Leu-352                          | X2                                 | 4.85                               |                                                               | Trp-387 | O<br>(OB) | 5.83     |      |  |  |  |  |  |  |  |
|                           |                          | Carbon<br>Hydrogen                 | Ser-530                            | H...O                              |                      | 2.82                             | Val-523                            | X1                                 |                                                               | 5.38    |           |          |      |  |  |  |  |  |  |  |
|                           | Ser-530                  |                                    | H...O                              | 2.50                               |                      | Ala-527                          | X1                                 | 3.57                               |                                                               |         |           |          |      |  |  |  |  |  |  |  |
|                           | Ser-530                  |                                    | H...O                              | 2.93                               |                      | Val-349                          | X                                  | 4.25                               |                                                               |         |           |          |      |  |  |  |  |  |  |  |
|                           |                          | Ala-527                            | X                                  | 3.47                               |                      |                                  |                                    |                                    |                                                               |         |           |          |      |  |  |  |  |  |  |  |
|                           |                          | Leu-531                            | X                                  | 4.12                               |                      |                                  |                                    |                                    |                                                               |         |           |          |      |  |  |  |  |  |  |  |
|                           |                          | Conventional<br>Hydrogen           | Ser-530                            | H...O                              | 2.10                 | Amide<br>Pi-stacked<br>Alkyl     | Gly-526                            | X1                                 | 4.12                                                          | Halogen | Met-522   | Br       | 3.12 |  |  |  |  |  |  |  |
|                           |                          |                                    |                                    |                                    |                      |                                  | Ala-527                            | X4                                 | 4.12                                                          |         |           |          |      |  |  |  |  |  |  |  |
|                           |                          |                                    |                                    |                                    |                      |                                  | Gly-526                            | X4                                 | 3.80                                                          |         |           |          |      |  |  |  |  |  |  |  |
|                           |                          |                                    |                                    |                                    |                      |                                  | Ala-527                            | X1                                 | 3.80                                                          |         |           |          |      |  |  |  |  |  |  |  |
|                           | Hydrogen                 |                                    | Ser-530                            | H...O                              | 2.71                 | Alkyl                            | Ala-527                            | X3                                 | 3.63                                                          |         |           |          |      |  |  |  |  |  |  |  |
|                           |                          |                                    |                                    | Val-349                            | X3                   |                                  | 4.39                               |                                    |                                                               |         |           |          |      |  |  |  |  |  |  |  |
|                           |                          |                                    |                                    | Leu-531                            | X3                   |                                  | 3.72                               |                                    |                                                               |         |           |          |      |  |  |  |  |  |  |  |
|                           |                          |                                    |                                    |                                    | Pi-Alkyl             | Val-349                          | X4                                 | 5.15                               |                                                               |         |           |          |      |  |  |  |  |  |  |  |
|                           |                          |                                    |                                    |                                    |                      | Leu-352                          | X4                                 | 4.83                               |                                                               |         |           |          |      |  |  |  |  |  |  |  |
|                           |                          |                                    |                                    |                                    |                      | Ala-527                          | X4                                 | 3.92                               |                                                               |         |           |          |      |  |  |  |  |  |  |  |
|                           |                          |                                    |                                    |                                    |                      | Leu-352                          | X1                                 | 5.17                               |                                                               |         |           |          |      |  |  |  |  |  |  |  |
|                           |                          |                                    |                                    |                                    |                      | Ala-527                          | X1                                 | 5.14                               |                                                               |         |           |          |      |  |  |  |  |  |  |  |
|                           |                          |                                    |                                    |                                    |                      |                                  |                                    |                                    |                                                               |         |           |          |      |  |  |  |  |  |  |  |
|                           |                          |                                    |                                    |                                    |                      |                                  |                                    |                                    |                                                               |         |           |          |      |  |  |  |  |  |  |  |
| 6-Bromoisatin             | Conventional<br>Hydrogen | Ser-530                            | H...O                              | 2.12                               | Amide<br>Pi-stacked  | Gly-526                          | X1                                 | 4.12                               | Halogen                                                       | Met-522 | Br        | 3.13     |      |  |  |  |  |  |  |  |
|                           |                          |                                    |                                    |                                    |                      | Ala-527                          | X4                                 | 4.12                               |                                                               |         |           |          |      |  |  |  |  |  |  |  |
|                           |                          |                                    |                                    |                                    |                      | Gly-526                          | X4                                 | 3.80                               |                                                               |         |           |          |      |  |  |  |  |  |  |  |
|                           |                          |                                    |                                    |                                    |                      | Ala-527                          | X1                                 | 3.80                               |                                                               |         |           |          |      |  |  |  |  |  |  |  |
|                           | Carbon<br>Hydrogen       | Ser-530                            | H...O                              | 2.70                               | Pi-Alkyl             | Val-349                          | X5                                 | 5.10                               |                                                               |         |           |          |      |  |  |  |  |  |  |  |
|                           |                          |                                    |                                    |                                    |                      | Leu-352                          | X5                                 | 4.78                               |                                                               |         |           |          |      |  |  |  |  |  |  |  |
|                           |                          |                                    |                                    |                                    |                      | Ala-527                          | X5                                 | 3.92                               |                                                               |         |           |          |      |  |  |  |  |  |  |  |
|                           |                          |                                    |                                    |                                    |                      | Leu-352                          | X1                                 | 5.14                               |                                                               |         |           |          |      |  |  |  |  |  |  |  |
|                           |                          |                                    |                                    |                                    |                      |                                  |                                    |                                    |                                                               |         |           |          |      |  |  |  |  |  |  |  |
| 6,6′dibromoindi-<br>rubin | Carbon<br>Hydrogen       | Ser-530                            | H...O                              | 2.92                               | Pi-pi T<br>shaped    | Tyr-355                          | X1                                 | 4.74                               |                                                               |         |           |          |      |  |  |  |  |  |  |  |
|                           |                          |                                    |                                    |                                    |                      | Gly-526                          | X6                                 | 4.95                               |                                                               |         |           |          |      |  |  |  |  |  |  |  |
|                           | Pi-donor<br>Hydrogen     | Arg-120                            | H...O                              | 3.00                               | Amide pi-<br>stacked | Ala-527                          | X6                                 | 4.95                               |                                                               |         |           |          |      |  |  |  |  |  |  |  |
|                           |                          |                                    |                                    |                                    |                      | Gly-526                          | X1                                 | 4.06                               |                                                               |         |           |          |      |  |  |  |  |  |  |  |
|                           |                          |                                    |                                    |                                    |                      | Ala-527                          | X1                                 | 4.06                               |                                                               |         |           |          |      |  |  |  |  |  |  |  |
|                           |                          |                                    |                                    |                                    |                      | Leu-352                          | Br                                 | 5.09                               |                                                               |         |           |          |      |  |  |  |  |  |  |  |
|                           |                          |                                    |                                    |                                    | Alkyl                | Met-522                          | Br                                 | 4.95                               |                                                               |         |           |          |      |  |  |  |  |  |  |  |
|                           |                          |                                    |                                    |                                    |                      | Trp-387                          | Br                                 | 5.22                               |                                                               |         |           |          |      |  |  |  |  |  |  |  |
|                           |                          |                                    |                                    |                                    | Pi-Alkyl             | Phe-518                          | Br                                 | 4.46                               |                                                               |         |           |          |      |  |  |  |  |  |  |  |
|                           |                          |                                    |                                    |                                    |                      | Val-116                          | X6                                 | 4.86                               |                                                               |         |           |          |      |  |  |  |  |  |  |  |

|  |         |    |      |
|--|---------|----|------|
|  | Val-349 | X6 | 5.35 |
|  | Leu-359 | X6 | 4.98 |
|  | Ala-527 | X6 | 4.93 |
|  | Leu-531 | X6 | 4.71 |
|  | Val-349 | X6 | 4.32 |
|  | Leu-352 | X1 | 4.81 |
|  | Ala-527 | X1 | 3.97 |

Here, X, X1, X2, X3 indicates that, X = Benzene, X1 = 6-Bromo benzene, X2 =Indole-3-ol, X3 = (Methylthio)methane, X4 = Indole-3-one, X5 = Indoline-2,3-dione, X6 = Indolin-2-one.

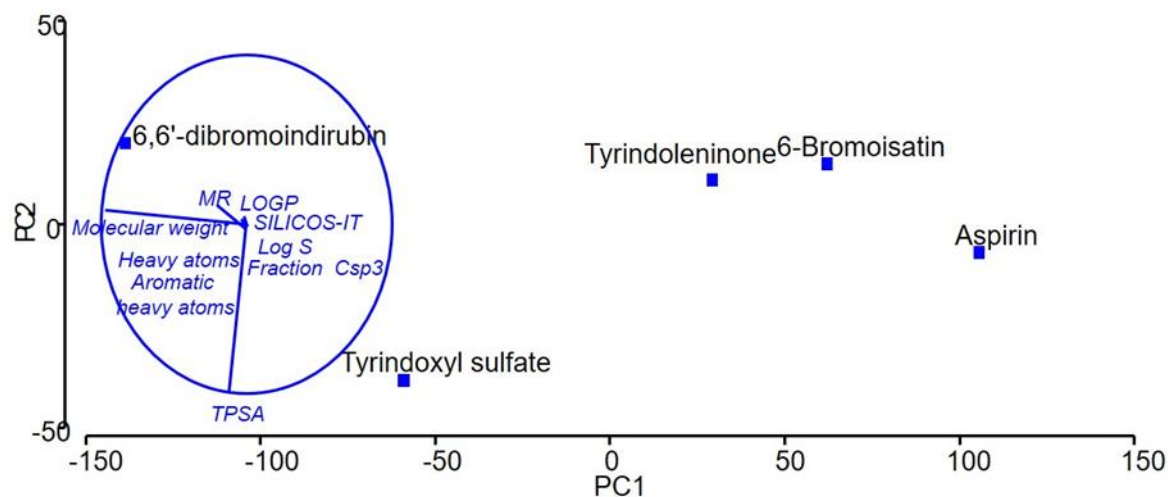

a)

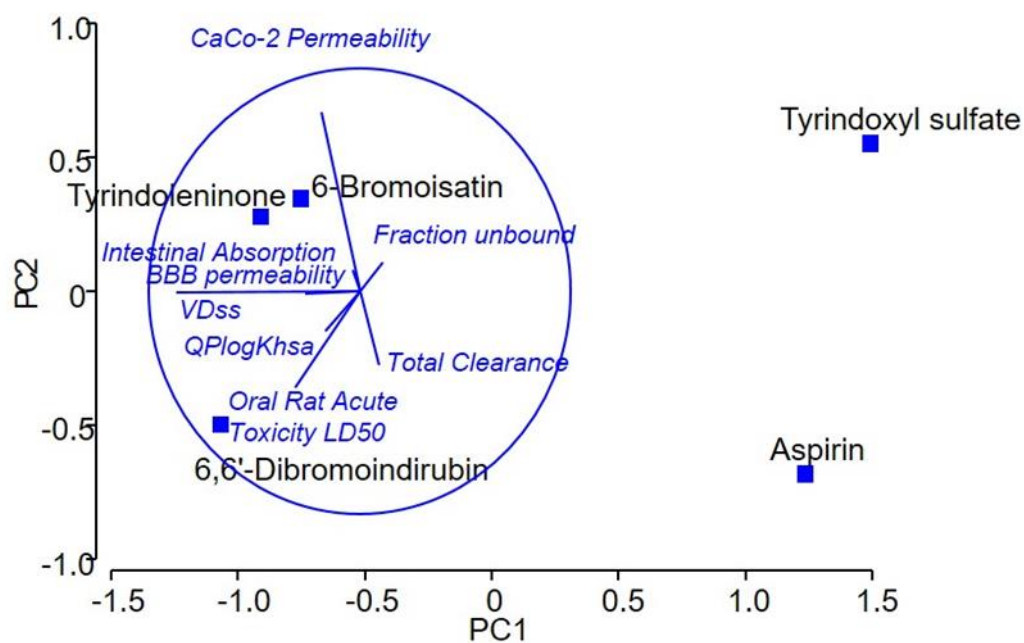

b)

**Figure S1.** Principle coordinate ordination showing the difference in a) physicochemical properties and b) pharmacokinetic properties of the brominated indoles from *Dicathais orbita*.
